# Supplementary material for: Conductive textiles prepared by spray coating of water-based graphene dispersions
Source: Royal Society of Chemistry journal article supplement (doi:10.1039/c9ra09164e), 2020-01-01
Supplement: c9ra09164e1.pdf [file c9ra09164e1.pdf]

### Supplementary information

Conductive textiles prepared by spray coating of water-based graphene dispersions

Archana Samanta<sup>a</sup>, Romain Bordes<sup>a\*</sup>

<sup>a</sup>Department of Chemical Engineering, Chalmers University of Technology, Gothenburg, Sweden

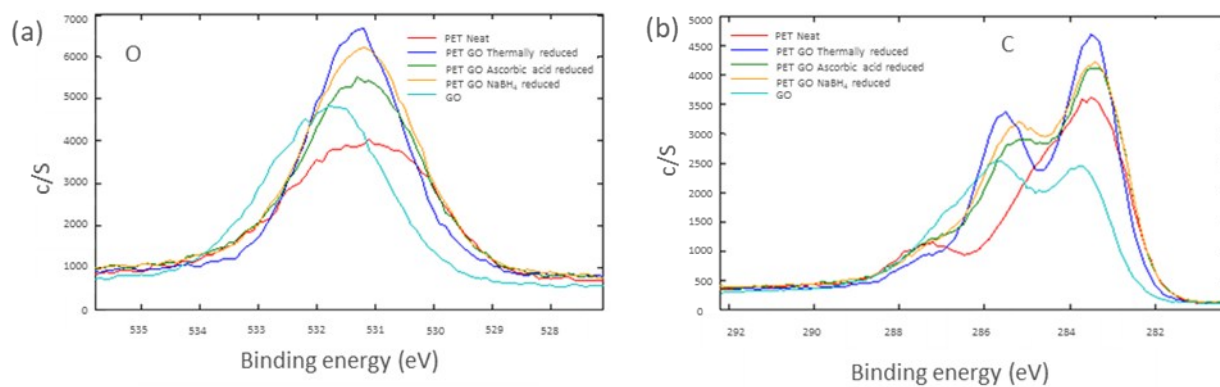

Figure S1. XPS data of samples. (a) high resolution oxygen peaks of samples. (b) high resolution carbon peaks of respective samples.

Table S1. Surface conductivity of samples after 10 washes.

| Sample code | Surface conductivity (mS/m)<br>Un-washed | Surface conductivity (mS/m)<br>After 10 washes |
|-------------|------------------------------------------|------------------------------------------------|
| SE1         | -- <sup>c</sup>                          | -- <sup>c</sup>                                |
| SE2         | -- <sup>c</sup>                          | -- <sup>c</sup>                                |
| SE3         | 0.31±.07                                 | 0.29±.09                                       |
| SE4         | 0.37±.05                                 | 0.35±.05                                       |
| SE5         | 0.45±.11                                 | 0.43±.07                                       |
| S1          | -- <sup>c</sup>                          | -- <sup>c</sup>                                |
| S2          | 0.37±.09                                 | 0.34±.10                                       |
| S3          | 0.48±.10                                 | 0.46±.07                                       |
| S4          | 0.69±.07                                 | 0.66±.05                                       |
| S5          | 2.38±.11                                 | 2.16±.14                                       |
| SA1         | 0.48±.11                                 | 0.46±.08                                       |
| SA2         | 0.55±.08                                 | 0.53±.07                                       |
| SA3         | 0.83±.09                                 | 0.79±.07                                       |
| SN1         | 0.37±.06                                 | 0.35±.05                                       |
| SN2         | 0.48±.08                                 | 0.45±.03                                       |
| SN3         | 0.69±.07                                 | 0.66±.06                                       |
| B1          | 0.41±.07                                 | 0.39±.05                                       |
| B2          | 0.53±.04                                 | 0.50±.04                                       |
| B3          | 1.28±.09                                 | 1.19±.07                                       |
| PETN        | -- <sup>c</sup>                          | -- <sup>c</sup>                                |

<sup>c</sup> Surface resistance was too high to be measured by the instrument

Table S2. Contact angle values of rGO textiles.

| Sl.No | Sample details                                                                      | Contact angle        |
|-------|-------------------------------------------------------------------------------------|----------------------|
| SE1   | 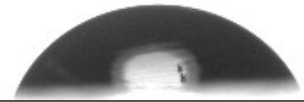   | $65^{\circ}\pm 11$ , |
| SE2   |    | $68^{\circ}\pm 7$    |
| SE3   |    | $74^{\circ}\pm 8$    |
| SE4   |    | $76^{\circ}\pm 10$   |
| SE5   |   | $76^{\circ}\pm 14$   |
| S1    |  | $69^{\circ}\pm 7$    |
| S2    |  | $71^{\circ}\pm 8$    |
| S3    |  | $71^{\circ}\pm 3$    |
| S4    |  | $75^{\circ}\pm 2$    |
| S5    |  | $79^{\circ}\pm 8$    |
| SA1   |  | $70^{\circ}\pm 5$    |
| SA2   |  | $73^{\circ}\pm 4$    |
| SA3   |  | $74^{\circ}\pm 2$    |

|      |                                                                                     |                    |
|------|-------------------------------------------------------------------------------------|--------------------|
| SN1  |    | $68^{\circ}\pm 3$  |
| SN2  |    | $77^{\circ}\pm 3$  |
| SN3  |    | $64^{\circ}\pm 4$  |
| B1   |    | $65^{\circ}\pm 8$  |
| B2   |    | $66^{\circ}\pm 5$  |
| B3   |   | $72^{\circ}\pm 7$  |
| PETN |  | $110^{\circ}\pm 2$ |

Table S3. Tensile properties of GO coated samples

| <b>Sample</b>         | <b>Tensile stress (Mpa)</b> | <b>Tensile strain (mm/mm)</b> |
|-----------------------|-----------------------------|-------------------------------|
| PET neat              | 58±6                        | 0.9±0.04                      |
| PET neat annealed     | 61±5                        | 0.76±0.03                     |
| PET + GO              | 60±4                        | 0.82±0.05                     |
| PET NaBH <sub>4</sub> | 68±5                        | 0.70±0.04                     |
| PET ascorbic acid     | 71±4                        | 0.66±0.03                     |
| PET GO annealed       | 79±5                        | 0.54±0.02                     |
